# Supplementary material
Source: Springer Nature journal article supplement (https://www.springermedizin.de/resource/supplementary/13054_2011_9910_MOESM7_ESM.pdf/9708434)

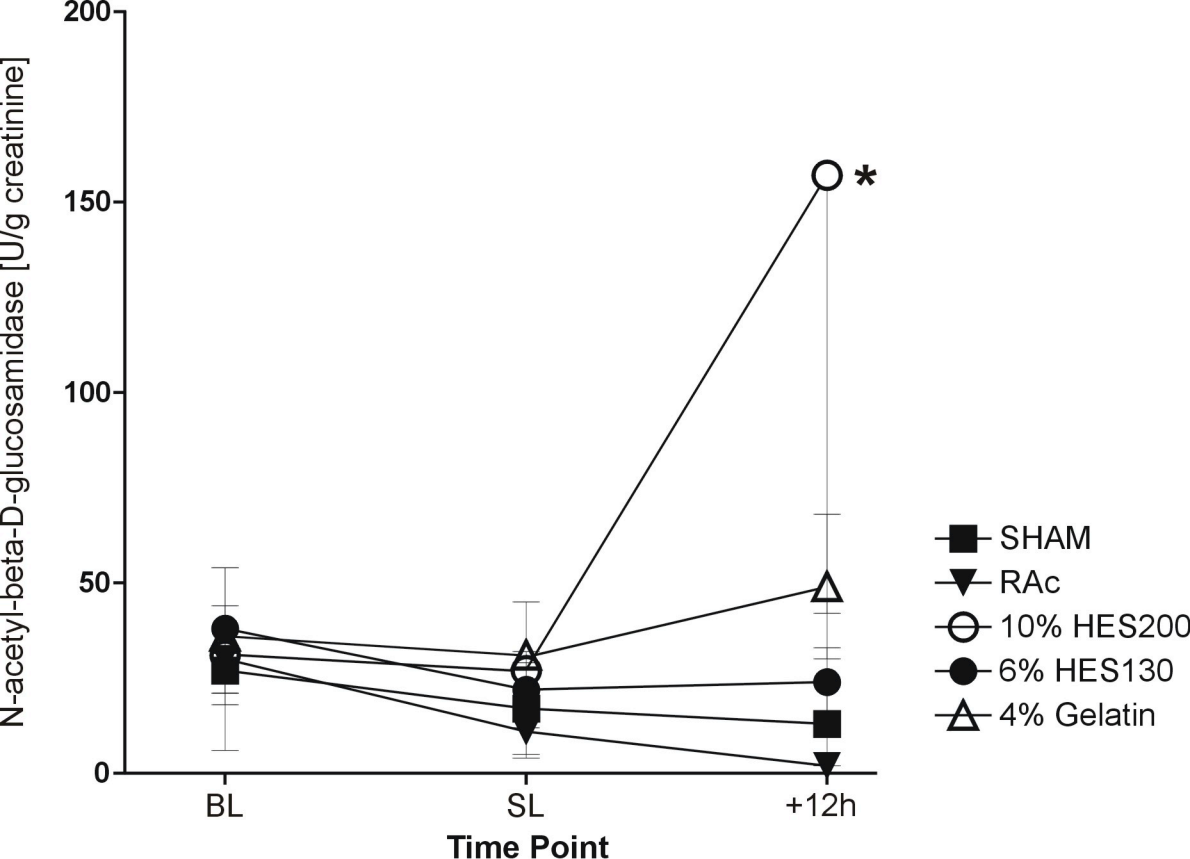

Supplement: MOESM7 [file 9708434]
